# Supplementary material for: Enhancement of TiO2 photocatalytic activity by structuring the photocatalyst film as photonic sponge
Source: Royal Society of Chemistry journal article supplement (doi:10.1039/b801954a), 2008-07-31
Supplement: b801954a.pdf [file b801954a.pdf]

## Enhancement of TiO<sub>2</sub> photocatalytic activity by structuring the photocatalyst film as photonic sponge

Esther Carbonell<sup>a</sup>, Fernando Ramiro-Manzano<sup>b</sup>, Isabelle Rodríguez<sup>b</sup>, Avelino Corma<sup>a</sup>,  
Francisco Meseguer<sup>\*b</sup> and Hermenegildo García<sup>\*a</sup>

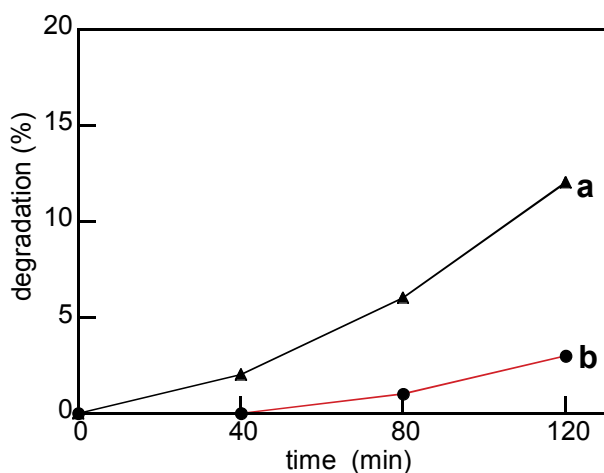

Figure S1. Photocatalytic activity of ps-TiO<sub>2</sub> upon irradiation with a 125 W medium pressure mercury lamp through a  $\lambda > 400$  nm cut-off filter.

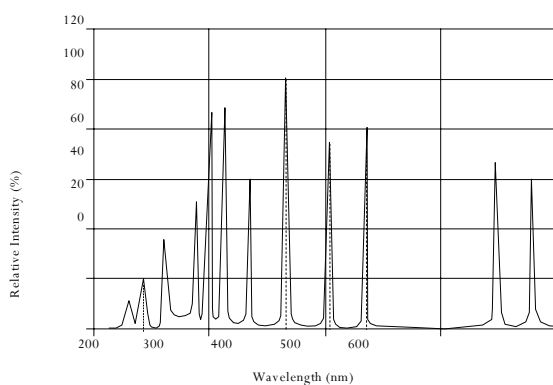

Figure S2. Emission spectrum of the 125 W medium pressure mercury lamp used in the photocatalytic study.
